# Supplementary material for: Transcriptome and Metabolome Analysis of Selenium Treated Alfalfa Reveals Influence on Phenylpropanoid Biosynthesis to Enhance Growth
Source: MDPI journal article supplement (doi:10.3390/plants12102038), 2023-05-19
Supplement: s1 [file s1]

**Table S1.** Primers of 8 selected DEGs for qRT-PCR analysis

| Gene id           |         | Primer(5'-3')             |
|-------------------|---------|---------------------------|
| MsG0680035608.01  | Forward | TGCTGGGTTTTTCATGCGTATATTC |
|                   | Reverse | AACTTGAGGAGGCACTTGGATG    |
| MsG0380015067.01  | Forward | CTTCCCTATGCCGATGACCTA     |
|                   | Reverse | AGCTAGTTCCTCAGTCCACCAAT   |
| MsG0180000030.01  | Forward | GACGCAGCAGCACCTCTACT      |
|                   | Reverse | CCAAACGTTCCCTAGCCTCAG     |
| MsG0780041447.01  | Forward | TGCAAACCAGCTTCCAATGTAAC   |
|                   | Reverse | GTCCACCTACAGCATAGTCAATACG |
| MsG0380015174.01  | Forward | TGAATGCAAGAAAGGGAAGTGGAAG |
|                   | Reverse | CTACAAGATATCCGCAAATCACAGC |
| MsG0780041366.01. | Forward | GATGCTTCATTGCTCATCATCACC  |
|                   | Reverse | GTTTCGGATTCTTTTGGTCGTTGA  |
| MsG0880043449.01  | Forward | GTGACATGGCTGGTGTGGTTATC   |
|                   | Reverse | ATCCTTCTATTGCTGTTTGAAGTGC |
| MsG0480018569.01  | Forward | GGGCACACTCAGGGAGGTCAAC    |
|                   | Reverse | TCATCGAGGATCTCAAGGCGTTC   |
| GAPDH             | Forward | GGCTGCCATCAAGGAGGAAT      |
|                   | Reverse | TCCAAGCTCAGCCTCATCAAG     |
