# Supplementary material for: Transcriptome and Metabolome Analysis of Selenium Treated Alfalfa Reveals Influence on Phenylpropanoid Biosynthesis to Enhance Growth
Source: MDPI journal article supplement (doi:10.3390/plants12102038), 2023-05-19
Supplement: s1 [file s1]

Table S2. Integrative analysis of differential metabolites and DEGs

| ID of DEGs           | Regulation | ID of DEMs    | Regulation | KEGG                                                                                            |
|----------------------|------------|---------------|------------|-------------------------------------------------------------------------------------------------|
| MsG0480<br>020550.01 | up         | pos-M653T209  | up         | ko00520                                                                                         |
| MsG0780<br>036197.01 | up         | pos-M148T52_1 | up         | ko00430                                                                                         |
| MsG0480<br>021518.01 | up         | pos-M147T286  | up         | ko00940                                                                                         |
| MsG0480<br>021518.01 | up         | pos-M165T285  | up         | ko00940                                                                                         |
| MsG0380<br>016360.01 | up         | pos-M291T263  | up         | ko00380;ko00280;ko00310;ko00010;ko00410;ko00071;ko00620;ko00903;ko00330;ko00340;ko00053;ko00561 |
| MsG0380<br>016360.01 | up         | pos-M929T234  | up         | ko00380;ko00280;ko00310;ko00010;ko00410;ko00071;ko00620;ko00903;ko00330;ko00340;ko00053;ko00561 |
| MsG0380<br>016360.01 | up         | pos-M170T178  | up         | ko00380;ko00280;ko00310;ko00010;ko00410;ko00071;ko00620;ko00903;ko00330;ko00340;ko00053;ko00561 |
| MsG0380<br>016360.01 | up         | pos-M268T183  | up         | ko00380;ko00280;ko00310;ko00010;ko00410;ko00071;ko00620;ko00903;ko00330;ko00340;ko00053;ko00561 |
| MsG0380<br>016360.01 | up         | pos-M170T178  | up         | ko00380;ko00280;ko00310;ko00010;ko00410;ko00071;ko00620;ko00903;ko00330;ko00340;ko00053;ko00561 |
| MsG0380<br>016360.01 | up         | pos-M148T52_1 | up         | ko00380;ko00280;ko00310;ko00010;ko00410;ko00071;ko00620;ko00903;ko00330;ko00340;ko00053;ko00561 |
| MsG0380<br>016360.01 | up         | pos-M272T184  | up         | ko00380;ko00280;ko00310;ko00010;ko00410;ko00071;ko00620;ko00903;ko00330;ko00340;ko00053;ko00561 |
| MsG0380<br>016360.01 | up         | pos-M215T94   | up         | ko00380;ko00280;ko00310;ko00010;ko00410;ko00071;ko00620;ko00903;ko00330;ko00340;ko00053;ko00561 |
| MsG0480<br>019214.01 | up         | pos-M148T52_1 | up         | ko00040                                                                                         |
| MsG0480<br>019214.01 | up         | pos-M215T94   | up         | ko00040                                                                                         |
| MsG0380<br>016463.01 | up         | pos-M139T177  | up         | ko00071;ko00592;ko00010;ko00350                                                                 |
| MsG0380<br>016463.01 | up         | pos-M170T178  | up         | ko00071;ko00592;ko00010;ko00350                                                                 |

|                      |    |               |    |                         |
|----------------------|----|---------------|----|-------------------------|
| MsG0780<br>040733.01 | up | pos-M139T177  | up | ko04075;ko04016         |
| MsG0480<br>021267.01 | up | pos-M653T209  | up | ko00500;ko00520         |
| MsG0380<br>015362.01 | up | pos-M139T177  | up | ko04016;ko04075         |
| MsG0480<br>021533.01 | up | pos-M170T178  | up | ko00220;ko00330;ko04626 |
| MsG0480<br>021533.01 | up | pos-M148T52_1 | up | ko00220;ko00330;ko04626 |
| MsG0480<br>021533.01 | up | pos-M272T184  | up | ko00220;ko00330;ko04626 |
| MsG0180<br>003601.01 | up | pos-M147T286  | up | ko00940                 |
| MsG0180<br>003601.01 | up | pos-M165T285  | up | ko00940                 |
| MsG0380<br>012690.01 | up | pos-M233T320  | up | ko00620;ko00710         |
| MsG0880<br>044676.01 | up | pos-M165T285  | up | ko00130                 |
| MsG0880<br>044676.01 | up | pos-M139T177  | up | ko00130                 |
| MsG0480<br>018671.01 | up | pos-M148T52_1 | up | ko00500;ko00460;ko00940 |
| MsG0480<br>018671.01 | up | pos-M147T286  | up | ko00500;ko00460;ko00940 |
| MsG0480<br>018671.01 | up | pos-M165T285  | up | ko00500;ko00460;ko00940 |
| MsG0280<br>008343.01 | up | pos-M139T177  | up | ko04016;ko04075         |
| MsG0380<br>013501.01 | up | pos-M170T178  | up | ko00750                 |
| MsG0480<br>018569.01 | up | pos-M139T177  | up | ko04075;ko04016         |
| MsG0480<br>019215.01 | up | pos-M148T52_1 | up | ko00040                 |
| MsG0480<br>019215.01 | up | pos-M215T94   | up | ko00040                 |
| MsG0480<br>021524.01 | up | pos-M147T286  | up | ko00940                 |
| MsG0480<br>021524.01 | up | pos-M165T285  | up | ko00940                 |
| MsG0780<br>041613.01 | up | pos-M334T263  | up | ko04146;ko00590         |

|                      |    |               |      |                                         |
|----------------------|----|---------------|------|-----------------------------------------|
| MsG0280<br>011263.01 | up | pos-M139T177  | up   | ko04075                                 |
| MsG0480<br>021433.01 | up | pos-M170T178  | up   | ko00330;ko00380;ko00360                 |
| MsG0480<br>021433.01 | up | pos-M148T52_1 | up   | ko00330;ko00380;ko00360                 |
| MsG0480<br>021433.01 | up | pos-M272T184  | up   | ko00330;ko00380;ko00360                 |
| MsG0480<br>021433.01 | up | pos-M291T263  | up   | ko00330;ko00380;ko00360                 |
| MsG0480<br>021433.01 | up | pos-M237T285  | up   | ko00330;ko00380;ko00360                 |
| MsG0480<br>021433.01 | up | pos-M165T285  | up   | ko00330;ko00380;ko00360                 |
| MsG0480<br>021433.01 | up | pos-M929T234  | up   | ko00330;ko00380;ko00360                 |
| MsG0380<br>011489.01 | up | pos-M147T286  | up   | ko00940                                 |
| MsG0380<br>011489.01 | up | pos-M165T285  | up   | ko00940                                 |
| MsG0080<br>048387.01 | up | pos-M148T52_1 | up   | ko00460                                 |
| MsG0880<br>046345.01 | up | pos-M147T286  | up   | ko00940                                 |
| MsG0880<br>046345.01 | up | pos-M165T285  | up   | ko00940                                 |
| MsG0180<br>005984.01 | up | pos-M271T215  | up   | ko00945;ko00941;ko00130;ko00360;ko00940 |
| MsG0180<br>005984.01 | up | pos-M165T285  | up   | ko00945;ko00941;ko00130;ko00360;ko00940 |
| MsG0180<br>005984.01 | up | pos-M139T177  | up   | ko00945;ko00941;ko00130;ko00360;ko00940 |
| MsG0180<br>005984.01 | up | pos-M237T285  | up   | ko00945;ko00941;ko00130;ko00360;ko00940 |
| MsG0180<br>005984.01 | up | pos-M165T285  | up   | ko00945;ko00941;ko00130;ko00360;ko00940 |
| MsG0180<br>005984.01 | up | pos-M929T234  | up   | ko00945;ko00941;ko00130;ko00360;ko00940 |
| MsG0180<br>005984.01 | up | pos-M147T286  | up   | ko00945;ko00941;ko00130;ko00360;ko00940 |
| MsG0180<br>005984.01 | up | pos-M165T285  | up   | ko00945;ko00941;ko00130;ko00360;ko00940 |
| MsG0780<br>040107.01 | up | pos-M445T199  | down | ko00592                                 |

|                      |    |                    |      |                                 |
|----------------------|----|--------------------|------|---------------------------------|
| MsG0180<br>004680.01 | up | pos-M527T56        | down | ko00052                         |
| MsG0480<br>021518.01 | up | pos-M649T272       | down | ko00940                         |
| MsG0480<br>021518.01 | up | pos-M151T237       | down | ko00940                         |
| MsG0480<br>021518.01 | up | pos-M349T201       | down | ko00940                         |
| MsG0480<br>021518.01 | up | pos-M147T253       | down | ko00940                         |
| MsG0480<br>018096.01 | up | pos-M233T374       | down | ko00909                         |
| MsG0480<br>020076.01 | up | pos-M231T69        | down | ko00945                         |
| MsG0380<br>016463.01 | up | pos-M445T199       | down | ko00071;ko00592;ko00010;ko00350 |
| MsG0680<br>031463.01 | up | pos-<br>M284T449_3 | down | ko00906                         |
| MsG0680<br>031463.01 | up | pos-M858T407       | down | ko00906                         |
| MsG0580<br>024178.01 | up | pos-M445T199       | down | ko00592                         |
| MsG0180<br>001827.01 | up | pos-<br>M284T449_3 | down | ko00906                         |
| MsG0180<br>001827.01 | up | pos-M858T407       | down | ko00906                         |
| MsG0180<br>003601.01 | up | pos-M649T272       | down | ko00940                         |
| MsG0180<br>003601.01 | up | pos-M151T237       | down | ko00940                         |
| MsG0180<br>003601.01 | up | pos-M349T201       | down | ko00940                         |
| MsG0180<br>003601.01 | up | pos-M147T253       | down | ko00940                         |
| MsG0880<br>044676.01 | up | pos-M439T410       | down | ko00130                         |
| MsG0380<br>012002.01 | up | pos-M415T191       | down | ko02010                         |
| MsG0380<br>012002.01 | up | pos-M527T56        | down | ko02010                         |
| MsG0380<br>016151.01 | up | pos-M307T300       | down | ko00061;ko04146;ko00071         |
| MsG0580<br>029922.01 | up | pos-M415T191       | down | ko02010                         |

|                      |    |                    |      |                         |
|----------------------|----|--------------------|------|-------------------------|
| MsG0580<br>029922.01 | up | pos-M527T56        | down | ko02010                 |
| MsG0480<br>018671.01 | up | pos-M649T272       | down | ko00500;ko00460;ko00940 |
| MsG0480<br>018671.01 | up | pos-M151T237       | down | ko00500;ko00460;ko00940 |
| MsG0480<br>018671.01 | up | pos-M349T201       | down | ko00500;ko00460;ko00940 |
| MsG0480<br>018671.01 | up | pos-M147T253       | down | ko00500;ko00460;ko00940 |
| MsG0580<br>028567.01 | up | pos-M231T69        | down | ko00945                 |
| MsG0580<br>024168.01 | up | pos-M445T199       | down | ko00592                 |
| MsG0480<br>021524.01 | up | pos-M649T272       | down | ko00940                 |
| MsG0480<br>021524.01 | up | pos-M151T237       | down | ko00940                 |
| MsG0480<br>021524.01 | up | pos-M349T201       | down | ko00940                 |
| MsG0480<br>021524.01 | up | pos-M147T253       | down | ko00940                 |
| MsG0580<br>024567.01 | up | pos-<br>M284T449_3 | down | ko00906                 |
| MsG0580<br>024567.01 | up | pos-M858T407       | down | ko00906                 |
| MsG0780<br>041613.01 | up | pos-M359T420       | down | ko04146;ko00590         |
| MsG0780<br>036262.01 | up | pos-M233T374       | down | ko00909                 |
| MsG0480<br>021433.01 | up | pos-M151T237       | down | ko00330;ko00380;ko00360 |
| MsG0380<br>011489.01 | up | pos-M649T272       | down | ko00940                 |
| MsG0380<br>011489.01 | up | pos-M151T237       | down | ko00940                 |
| MsG0380<br>011489.01 | up | pos-M349T201       | down | ko00940                 |
| MsG0380<br>011489.01 | up | pos-M147T253       | down | ko00940                 |
| MsG0880<br>047256.01 | up | pos-M415T191       | down | ko02010                 |
| MsG0880<br>047256.01 | up | pos-M527T56        | down | ko02010                 |

|                      |      |              |      |                                             |
|----------------------|------|--------------|------|---------------------------------------------|
| MsG0880<br>046345.01 | up   | pos-M649T272 | down | ko00940                                     |
| MsG0880<br>046345.01 | up   | pos-M151T237 | down | ko00940                                     |
| MsG0880<br>046345.01 | up   | pos-M349T201 | down | ko00940                                     |
| MsG0880<br>046345.01 | up   | pos-M147T253 | down | ko00940                                     |
| MsG0180<br>005984.01 | up   | pos-M231T69  | down | ko00945;ko00941;ko00130;ko00360;k<br>o00940 |
| MsG0180<br>005984.01 | up   | pos-M433T253 | down | ko00945;ko00941;ko00130;ko00360;k<br>o00940 |
| MsG0180<br>005984.01 | up   | pos-M439T410 | down | ko00945;ko00941;ko00130;ko00360;k<br>o00940 |
| MsG0180<br>005984.01 | up   | pos-M151T237 | down | ko00945;ko00941;ko00130;ko00360;k<br>o00940 |
| MsG0180<br>005984.01 | up   | pos-M649T272 | down | ko00945;ko00941;ko00130;ko00360;k<br>o00940 |
| MsG0180<br>005984.01 | up   | pos-M151T237 | down | ko00945;ko00941;ko00130;ko00360;k<br>o00940 |
| MsG0180<br>005984.01 | up   | pos-M349T201 | down | ko00945;ko00941;ko00130;ko00360;k<br>o00940 |
| MsG0180<br>005984.01 | up   | pos-M147T253 | down | ko00945;ko00941;ko00130;ko00360;k<br>o00940 |
| MsG0780<br>039574.01 | down | pos-M433T253 | down | ko00943                                     |
| MsG0580<br>030181.01 | down | pos-M649T272 | down | ko00940;ko00360                             |
| MsG0580<br>030181.01 | down | pos-M151T237 | down | ko00940;ko00360                             |
| MsG0580<br>030181.01 | down | pos-M349T201 | down | ko00940;ko00360                             |
| MsG0580<br>030181.01 | down | pos-M147T253 | down | ko00940;ko00360                             |
| MsG0580<br>030181.01 | down | pos-M151T237 | down | ko00940;ko00360                             |
| MsG0880<br>045881.01 | down | pos-M433T253 | down | ko00941;ko00945;ko00360;ko00940             |
| MsG0880<br>045881.01 | down | pos-M231T69  | down | ko00941;ko00945;ko00360;ko00940             |
| MsG0880<br>045881.01 | down | pos-M151T237 | down | ko00941;ko00945;ko00360;ko00940             |
| MsG0880<br>045881.01 | down | pos-M649T272 | down | ko00941;ko00945;ko00360;ko00940             |

|                      |      |              |      |                                 |
|----------------------|------|--------------|------|---------------------------------|
| MsG0880<br>045881.01 | down | pos-M151T237 | down | ko00941;ko00945;ko00360;ko00940 |
| MsG0880<br>045881.01 | down | pos-M349T201 | down | ko00941;ko00945;ko00360;ko00940 |
| MsG0880<br>045881.01 | down | pos-M147T253 | down | ko00941;ko00945;ko00360;ko00940 |
| MsG0180<br>000030.01 | down | pos-M649T272 | down | ko00940                         |
| MsG0180<br>000030.01 | down | pos-M151T237 | down | ko00940                         |
| MsG0180<br>000030.01 | down | pos-M349T201 | down | ko00940                         |
| MsG0180<br>000030.01 | down | pos-M147T253 | down | ko00940                         |
| MsG0180<br>005051.01 | down | pos-M415T191 | down | ko02010                         |
| MsG0180<br>005051.01 | down | pos-M527T56  | down | ko02010                         |
| MsG0280<br>008072.01 | down | pos-M433T253 | down | ko00943                         |
| MsG0780<br>038491.01 | down | pos-M649T272 | down | ko00940                         |
| MsG0780<br>038491.01 | down | pos-M151T237 | down | ko00940                         |
| MsG0780<br>038491.01 | down | pos-M349T201 | down | ko00940                         |
| MsG0780<br>038491.01 | down | pos-M147T253 | down | ko00940                         |
| MsG0580<br>028020.01 | down | pos-M439T410 | down | ko00130                         |
| MsG0380<br>013348.01 | down | pos-M649T272 | down | ko00940                         |
| MsG0380<br>013348.01 | down | pos-M151T237 | down | ko00940                         |
| MsG0380<br>013348.01 | down | pos-M349T201 | down | ko00940                         |
| MsG0380<br>013348.01 | down | pos-M147T253 | down | ko00940                         |
| MsG0380<br>016745.01 | down | pos-M649T272 | down | ko00940                         |
| MsG0380<br>016745.01 | down | pos-M151T237 | down | ko00940                         |
| MsG0380<br>016745.01 | down | pos-M349T201 | down | ko00940                         |

|                      |      |              |      |                                 |
|----------------------|------|--------------|------|---------------------------------|
| MsG0380<br>016745.01 | down | pos-M147T253 | down | ko00940                         |
| MsG0380<br>014934.01 | down | pos-M649T272 | down | ko00940                         |
| MsG0380<br>014934.01 | down | pos-M151T237 | down | ko00940                         |
| MsG0380<br>014934.01 | down | pos-M349T201 | down | ko00940                         |
| MsG0380<br>014934.01 | down | pos-M147T253 | down | ko00940                         |
| MsG0480<br>018433.01 | down | pos-M415T191 | down | ko02010                         |
| MsG0480<br>018433.01 | down | pos-M527T56  | down | ko02010                         |
| MsG0480<br>020786.01 | down | pos-M307T300 | down | ko00333;ko01040;ko00061;ko00780 |
| MsG0480<br>020786.01 | down | pos-M307T300 | down | ko00333;ko01040;ko00061;ko00780 |
| MsG0680<br>030961.01 | down | pos-M433T253 | down | ko00943;ko00944                 |
| MsG0680<br>030961.01 | down | pos-M579T241 | down | ko00943;ko00944                 |
| MsG0680<br>030961.01 | down | pos-M433T253 | down | ko00943;ko00944                 |
| MsG0580<br>030055.01 | down | pos-M527T56  | down | ko00052                         |
| MsG0480<br>022309.01 | down | pos-M433T253 | down | ko00943                         |
| MsG0580<br>025234.01 | down | pos-M649T272 | down | ko00940                         |
| MsG0580<br>025234.01 | down | pos-M151T237 | down | ko00940                         |
| MsG0580<br>025234.01 | down | pos-M349T201 | down | ko00940                         |
| MsG0580<br>025234.01 | down | pos-M147T253 | down | ko00940                         |
| MsG0380<br>017247.01 | down | pos-M345T206 | down | ko00770;ko00290;ko00270;ko00280 |
| MsG0380<br>017247.01 | down | pos-M340T206 | down | ko00770;ko00290;ko00270;ko00280 |
| MsG0380<br>017247.01 | down | pos-M181T206 | down | ko00770;ko00290;ko00270;ko00280 |
| MsG0480<br>022835.01 | down | pos-M433T253 | down | ko00943                         |



|                      |      |              |      |                                 |
|----------------------|------|--------------|------|---------------------------------|
| MsG0580<br>030022.01 | down | pos-M527T56  | down | ko00052                         |
| MsG0380<br>012312.01 | down | pos-M415T191 | down | ko02010                         |
| MsG0380<br>012312.01 | down | pos-M527T56  | down | ko02010                         |
| MsG0880<br>042881.01 | down | pos-M433T253 | down | ko00941                         |
| MsG0680<br>032461.01 | down | pos-M649T272 | down | ko00940                         |
| MsG0680<br>032461.01 | down | pos-M151T237 | down | ko00940                         |
| MsG0680<br>032461.01 | down | pos-M349T201 | down | ko00940                         |
| MsG0680<br>032461.01 | down | pos-M147T253 | down | ko00940                         |
| MsG0180<br>000436.01 | down | pos-M527T56  | down | ko00052;ko00500                 |
| MsG0280<br>007686.01 | down | pos-M649T272 | down | ko00940                         |
| MsG0280<br>007686.01 | down | pos-M151T237 | down | ko00940                         |
| MsG0280<br>007686.01 | down | pos-M349T201 | down | ko00940                         |
| MsG0280<br>007686.01 | down | pos-M147T253 | down | ko00940                         |
| MsG0580<br>025965.01 | down | pos-M433T253 | down | ko00941                         |
| MsG0580<br>025922.01 | down | pos-M345T206 | down | ko00770;ko00290;ko00280;ko00270 |
| MsG0580<br>025922.01 | down | pos-M340T206 | down | ko00770;ko00290;ko00280;ko00270 |
| MsG0580<br>025922.01 | down | pos-M181T206 | down | ko00770;ko00290;ko00280;ko00270 |
| MsG0480<br>018440.01 | down | pos-M291T281 | down | ko00904                         |
| MsG0480<br>018440.01 | down | pos-M307T300 | down | ko00904                         |
| MsG0180<br>000437.01 | down | pos-M527T56  | down | ko00052;ko00500                 |
| MsG0780<br>036575.01 | down | pos-M433T253 | down | ko00943                         |
| MsG0780<br>039574.01 | down | pos-M301T296 | up   | ko00943                         |

|                      |      |                    |    |                                 |
|----------------------|------|--------------------|----|---------------------------------|
| MsG0780<br>039574.01 | down | pos-M271T215       | up | ko00943                         |
| MsG0780<br>039574.01 | down | pos-<br>M286T448_6 | up | ko00943                         |
| MsG0580<br>030181.01 | down | pos-M147T286       | up | ko00940;ko00360                 |
| MsG0580<br>030181.01 | down | pos-M165T285       | up | ko00940;ko00360                 |
| MsG0580<br>030181.01 | down | pos-M237T285       | up | ko00940;ko00360                 |
| MsG0580<br>030181.01 | down | pos-M165T285       | up | ko00940;ko00360                 |
| MsG0580<br>030181.01 | down | pos-M929T234       | up | ko00940;ko00360                 |
| MsG0280<br>006550.01 | down | pos-M139T177       | up | ko04075;ko04016;ko04626         |
| MsG0880<br>045881.01 | down | pos-M271T215       | up | ko00941;ko00945;ko00360;ko00940 |
| MsG0880<br>045881.01 | down | pos-M237T285       | up | ko00941;ko00945;ko00360;ko00940 |
| MsG0880<br>045881.01 | down | pos-M165T285       | up | ko00941;ko00945;ko00360;ko00940 |
| MsG0880<br>045881.01 | down | pos-M929T234       | up | ko00941;ko00945;ko00360;ko00940 |
| MsG0880<br>045881.01 | down | pos-M147T286       | up | ko00941;ko00945;ko00360;ko00940 |
| MsG0880<br>045881.01 | down | pos-M165T285       | up | ko00941;ko00945;ko00360;ko00940 |
| MsG0180<br>000030.01 | down | pos-M147T286       | up | ko00940                         |
| MsG0180<br>000030.01 | down | pos-M165T285       | up | ko00940                         |
| MsG0380<br>018070.01 | down | pos-M653T209       | up | ko00520;ko04016                 |
| MsG0780<br>041428.01 | down | pos-M139T177       | up | ko04075;ko04712                 |
| MsG0280<br>008072.01 | down | pos-M301T296       | up | ko00943                         |
| MsG0280<br>008072.01 | down | pos-M271T215       | up | ko00943                         |
| MsG0280<br>008072.01 | down | pos-<br>M286T448_6 | up | ko00943                         |
| MsG0880<br>042495.01 | down | pos-M215T94        | up | ko00562;ko00053                 |

|                      |      |               |    |                         |
|----------------------|------|---------------|----|-------------------------|
| MsG0780<br>036260.01 | down | pos-M653T209  | up | ko00520;ko04016         |
| MsG0680<br>030315.01 | down | pos-M215T94   | up | ko00053;ko00520;ko00040 |
| MsG0680<br>030315.01 | down | pos-M653T209  | up | ko00053;ko00520;ko00040 |
| MsG0680<br>030315.01 | down | pos-M148T52_1 | up | ko00053;ko00520;ko00040 |
| MsG0680<br>030315.01 | down | pos-M215T94   | up | ko00053;ko00520;ko00040 |
| MsG0780<br>038491.01 | down | pos-M147T286  | up | ko00940                 |
| MsG0780<br>038491.01 | down | pos-M165T285  | up | ko00940                 |
| MsG0580<br>028020.01 | down | pos-M165T285  | up | ko00130                 |
| MsG0580<br>028020.01 | down | pos-M139T177  | up | ko00130                 |
| MsG0180<br>000751.01 | down | pos-M653T209  | up | ko00520                 |
| MsG0380<br>013348.01 | down | pos-M147T286  | up | ko00940                 |
| MsG0380<br>013348.01 | down | pos-M165T285  | up | ko00940                 |
| MsG0880<br>046970.01 | down | pos-M233T320  | up | ko00710;ko00620         |
| MsG0380<br>016745.01 | down | pos-M147T286  | up | ko00940                 |
| MsG0380<br>016745.01 | down | pos-M165T285  | up | ko00940                 |
| MsG0680<br>031118.01 | down | pos-M139T177  | up | ko00260;ko00400         |
| MsG0380<br>014934.01 | down | pos-M147T286  | up | ko00940                 |
| MsG0380<br>014934.01 | down | pos-M165T285  | up | ko00940                 |
| MsG0080<br>048889.01 | down | pos-M148T52_1 | up | ko00040                 |
| MsG0080<br>048889.01 | down | pos-M215T94   | up | ko00040                 |
| MsG0880<br>045572.01 | down | pos-M653T209  | up | ko00520;ko04016         |
| MsG0880<br>047320.01 | down | pos-M291T263  | up | ko00380                 |

|                      |      |                    |    |                                 |
|----------------------|------|--------------------|----|---------------------------------|
| MsG0680<br>031451.01 | down | pos-M653T209       | up | ko00520                         |
| MsG0680<br>030961.01 | down | pos-M301T296       | up | ko00943;ko00944                 |
| MsG0680<br>030961.01 | down | pos-M271T215       | up | ko00943;ko00944                 |
| MsG0680<br>030961.01 | down | pos-<br>M286T448_6 | up | ko00943;ko00944                 |
| MsG0680<br>030961.01 | down | pos-M301T296       | up | ko00943;ko00944                 |
| MsG0680<br>030961.01 | down | pos-<br>M635T214_2 | up | ko00943;ko00944                 |
| MsG0480<br>022309.01 | down | pos-M301T296       | up | ko00943                         |
| MsG0480<br>022309.01 | down | pos-M271T215       | up | ko00943                         |
| MsG0480<br>022309.01 | down | pos-<br>M286T448_6 | up | ko00943                         |
| MsG0580<br>025234.01 | down | pos-M147T286       | up | ko00940                         |
| MsG0580<br>025234.01 | down | pos-M165T285       | up | ko00940                         |
| MsG0380<br>017247.01 | down | pos-M244T263       | up | ko00770;ko00290;ko00270;ko00280 |
| MsG0380<br>017247.01 | down | pos-M148T52_1      | up | ko00770;ko00290;ko00270;ko00280 |
| MsG0380<br>017247.01 | down | pos-M929T234       | up | ko00770;ko00290;ko00270;ko00280 |
| MsG0480<br>022835.01 | down | pos-M301T296       | up | ko00943                         |
| MsG0480<br>022835.01 | down | pos-M271T215       | up | ko00943                         |
| MsG0480<br>022835.01 | down | pos-<br>M286T448_6 | up | ko00943                         |
| MsG0880<br>045571.01 | down | pos-M653T209       | up | ko04016;ko00520                 |
| MsG0880<br>042881.01 | down | pos-M271T215       | up | ko00941                         |
| MsG0280<br>006552.01 | down | pos-M139T177       | up | ko04016;ko04626;ko04075         |
| MsG0680<br>032461.01 | down | pos-M147T286       | up | ko00940                         |
| MsG0680<br>032461.01 | down | pos-M165T285       | up | ko00940                         |

|                      |      |                    |    |                                 |
|----------------------|------|--------------------|----|---------------------------------|
| MsG0280<br>007686.01 | down | pos-M147T286       | up | ko00940                         |
| MsG0280<br>007686.01 | down | pos-M165T285       | up | ko00940                         |
| MsG0580<br>026720.01 | down | pos-M653T209       | up | ko00520;ko00051;ko00500         |
| MsG0580<br>025965.01 | down | pos-M271T215       | up | ko00941                         |
| MsG0580<br>025922.01 | down | pos-M244T263       | up | ko00770;ko00290;ko00280;ko00270 |
| MsG0580<br>025922.01 | down | pos-M148T52_1      | up | ko00770;ko00290;ko00280;ko00270 |
| MsG0580<br>025922.01 | down | pos-M929T234       | up | ko00770;ko00290;ko00280;ko00270 |
| MsG0480<br>018440.01 | down | pos-M334T263       | up | ko00904                         |
| MsG0780<br>038305.01 | down | pos-M148T52_1      | up | ko00040                         |
| MsG0780<br>038305.01 | down | pos-M215T94        | up | ko00040                         |
| MsG0280<br>006553.01 | down | pos-M139T177       | up | ko04626;ko04016;ko04075         |
| MsG0780<br>036575.01 | down | pos-M301T296       | up | ko00943                         |
| MsG0780<br>036575.01 | down | pos-M271T215       | up | ko00943                         |
| MsG0780<br>036575.01 | down | pos-<br>M286T448_6 | up | ko00943                         |
| MsG0180<br>002935.01 | down | pos-M139T177       | up | ko04075                         |

---
