# Supplementary material for: Transcriptome and Metabolome Analysis of Selenium Treated Alfalfa Reveals Influence on Phenylpropanoid Biosynthesis to Enhance Growth
Source: MDPI journal article supplement (doi:10.3390/plants12102038), 2023-05-19
Supplement: s1 [file s1]

**Table S5.** Identification of basic physicochemical properties of genes in phenylpropanoid biosynthesis pathway

| Gene id                  | Chromosome: location/bp | Number of amino acids | Molecular weight/ku | Isoelectric point | Instability index | Aliphatic index | Grand average of hydropathicity |
|--------------------------|-------------------------|-----------------------|---------------------|-------------------|-------------------|-----------------|---------------------------------|
| MsG08<br>8004588<br>1.01 | 8:65938326<br>-65940246 | 246                   | 27715.98            | 5.5               | 40.37             | 101.91          | -0.123                          |
| MsG01<br>8000003<br>0.01 | 1:508395-<br>511538     | 278                   | 30529.17            | 5.8               | 36.4              | 95.72           | -0.017                          |
| MsG04<br>8002151<br>8.01 | 4:58992075<br>-58993350 | 320                   | 34379.02            | 8.34              | 32.22             | 85.41           | -0.011                          |
| MsG07<br>8003849<br>1.01 | 7:47642511<br>-47645114 | 373                   | 42130.05            | 5.7               | 35.98             | 93.75           | -0.233                          |
| MsG03<br>8001334<br>8.01 | 3:35640148<br>-35640669 | 173                   | 19664.47            | 5.01              | 35.68             | 103.06          | -0.094                          |
| MsG03<br>8001674<br>5.01 | 3:87338418<br>-87343610 | 97                    | 10228.32            | 7.82              | 11.77             | 66.39           | -0.642                          |
| MsG03<br>8001493<br>4.01 | 3:62730558<br>-62732167 | 256                   | 26843.84            | 5.34              | 23.66             | 73.55           | -0.17                           |
| MsG01<br>8000360<br>1.01 | 1:65026421<br>-65033431 | 100                   | 11449.28            | 8.75              | 41                | 104.3           | 0.247                           |
| MsG05<br>8002523<br>4.01 | 5:15672068<br>-15675816 | 519                   | 58649.14            | 6.01              | 40.13             | 93.04           | -0.105                          |
| MsG06<br>8003246<br>1.01 | 6:41833043<br>-41838048 | 352                   | 38505.79            | 8.36              | 32.58             | 83.64           | -0.16                           |
| MsG02<br>8000768<br>6.01 | 2:19198463<br>-19201765 | 319                   | 35309.67            | 9.07              | 33.65             | 93.82           | -0.083                          |
| MsG04<br>8002152<br>4.01 | 4:59036368<br>-59047267 | 364                   | 40658.68            | 8.1               | 30.87             | 73.46           | -0.484                          |

|                          |                               |     |          |      |       |       |        |
|--------------------------|-------------------------------|-----|----------|------|-------|-------|--------|
| MsG03<br>8001148<br>9.01 | 3:201178-<br>209562           | 308 | 33884.88 | 8.12 | 30.35 | 94.03 | -0.069 |
| MsG08<br>8004634<br>5.01 | 8:72258351<br>-72259115       | 254 | 28248.3  | 7.08 | 44.68 | 73.7  | -0.228 |
| MsG05<br>8003018<br>1.01 | 5:10791233<br>7-<br>107914508 | 536 | 58955.57 | 5.91 | 37.3  | 96.62 | -0.081 |
| MsG04<br>8001867<br>1.01 | 4:8451791-<br>8458805         | 306 | 34645.55 | 5.91 | 34.57 | 80.88 | -0.195 |
| MsG01<br>8000598<br>4.01 | 1:98481320<br>-98486933       | 417 | 47492.88 | 7.06 | 39.34 | 92.28 | -0.224 |

---
