# Supplementary material for: Transcriptome and Metabolome Analysis of Selenium Treated Alfalfa Reveals Influence on Phenylpropanoid Biosynthesis to Enhance Growth
Source: MDPI journal article supplement (doi:10.3390/plants12102038), 2023-05-19
Supplement: s1 [file s1]

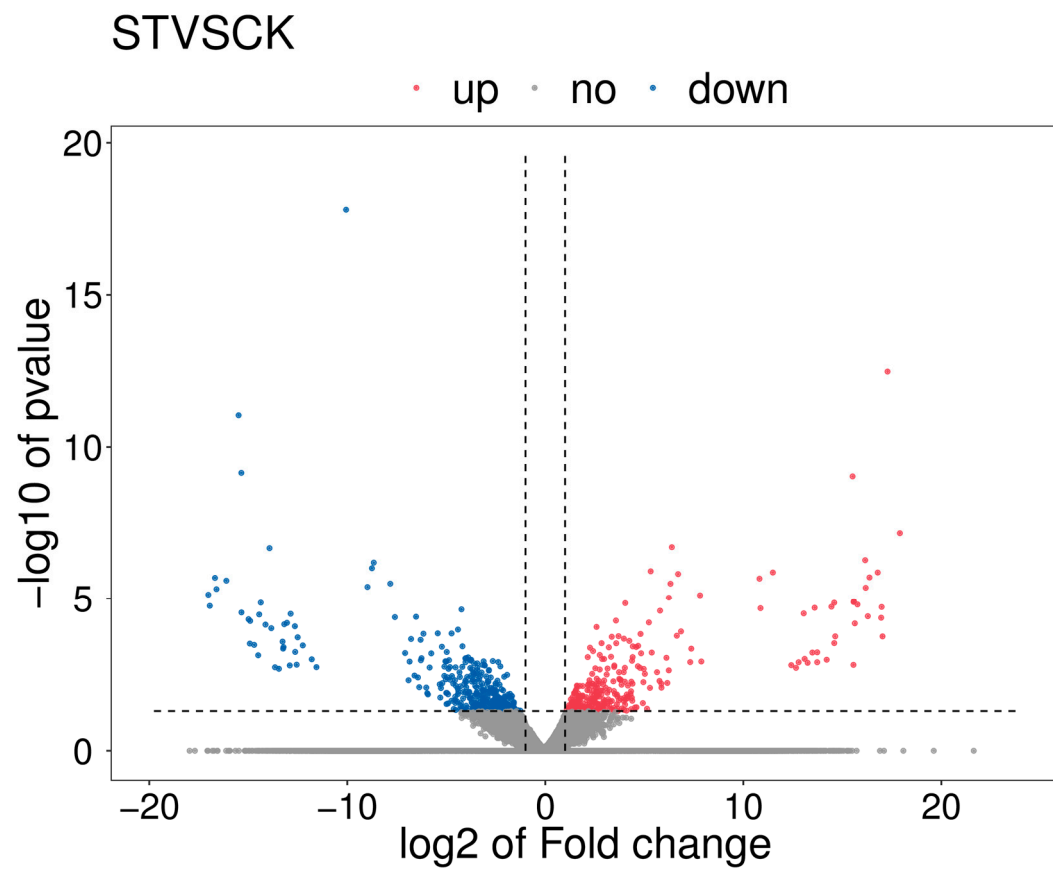

Figure S1: The volcano diagram of DEGs

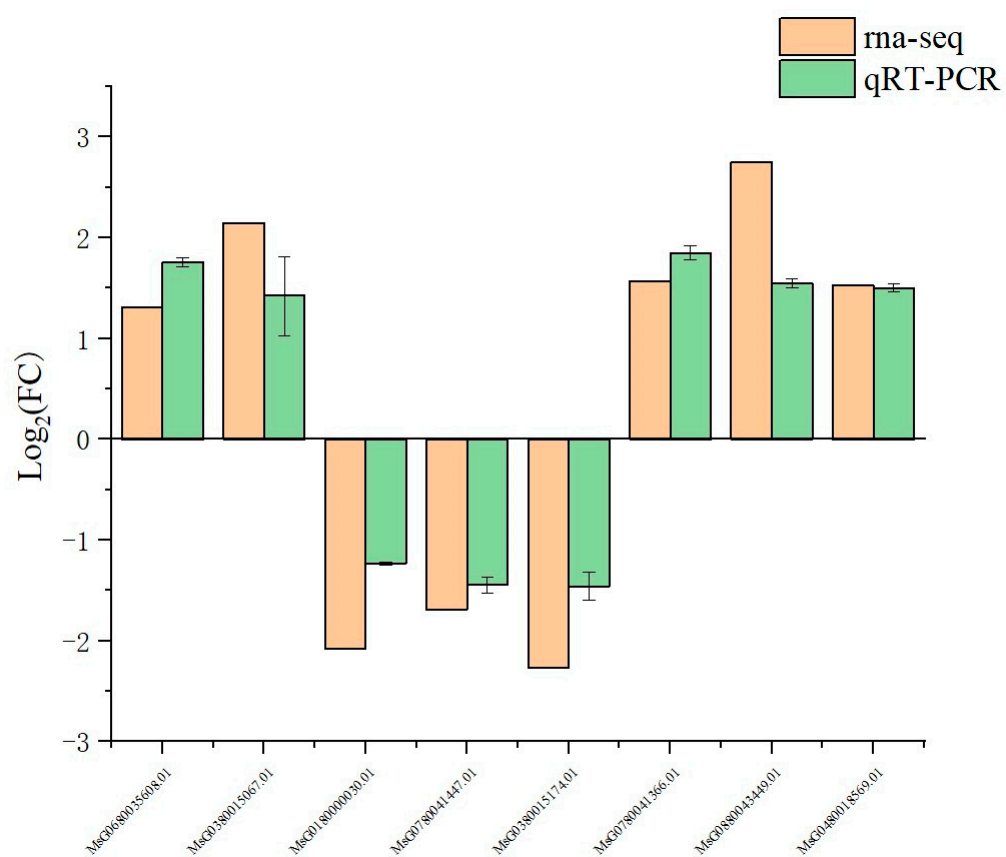

Figure S2: The qRT-PCR verification of selected genes

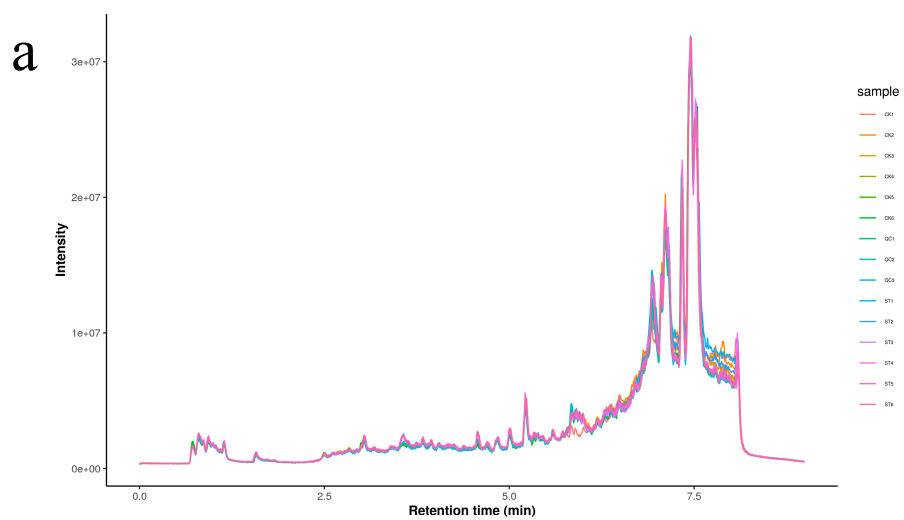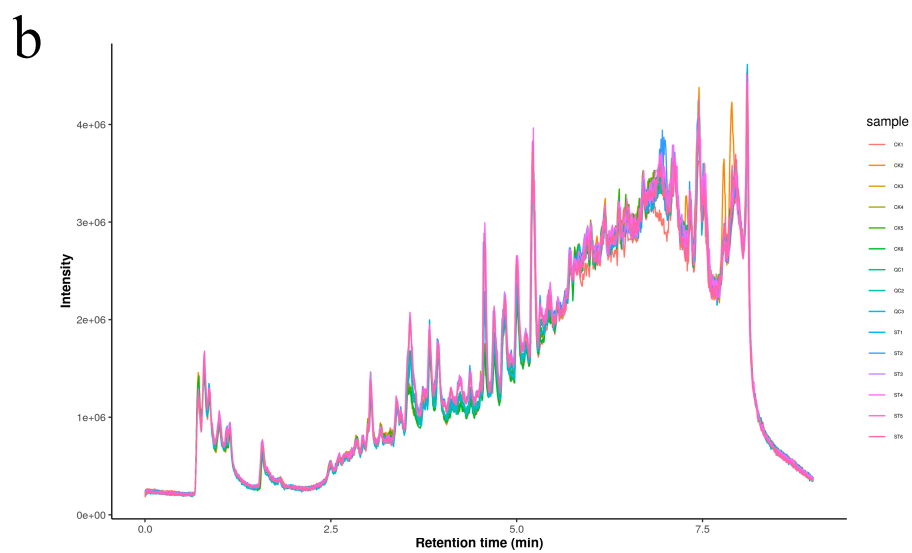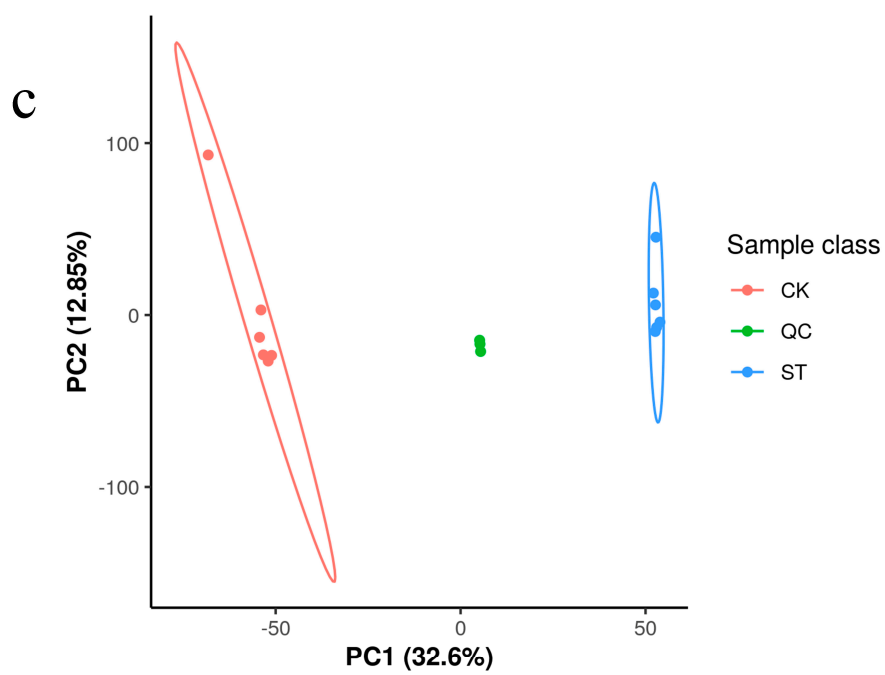

Figure S3: The positive (a) and negative (b) total ion flow chromatogram diagram and the PCA analysis (c) of alfalfa samples

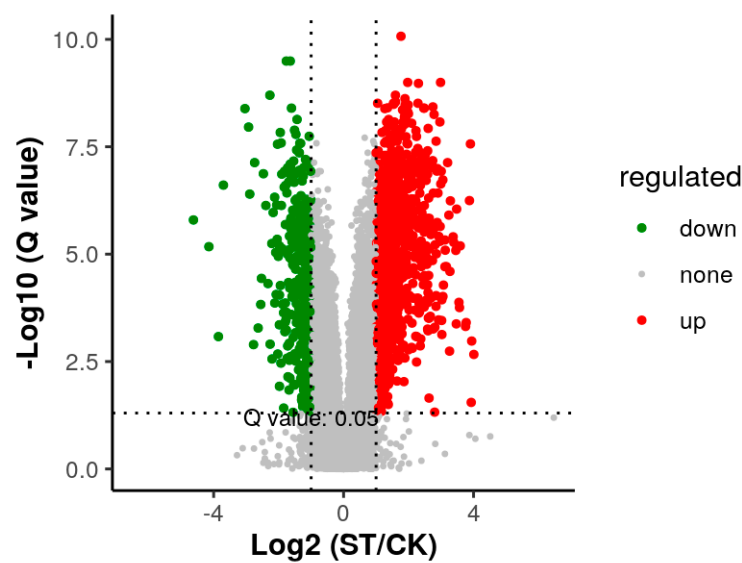

Figure S4: The volcano diagram of DEMs

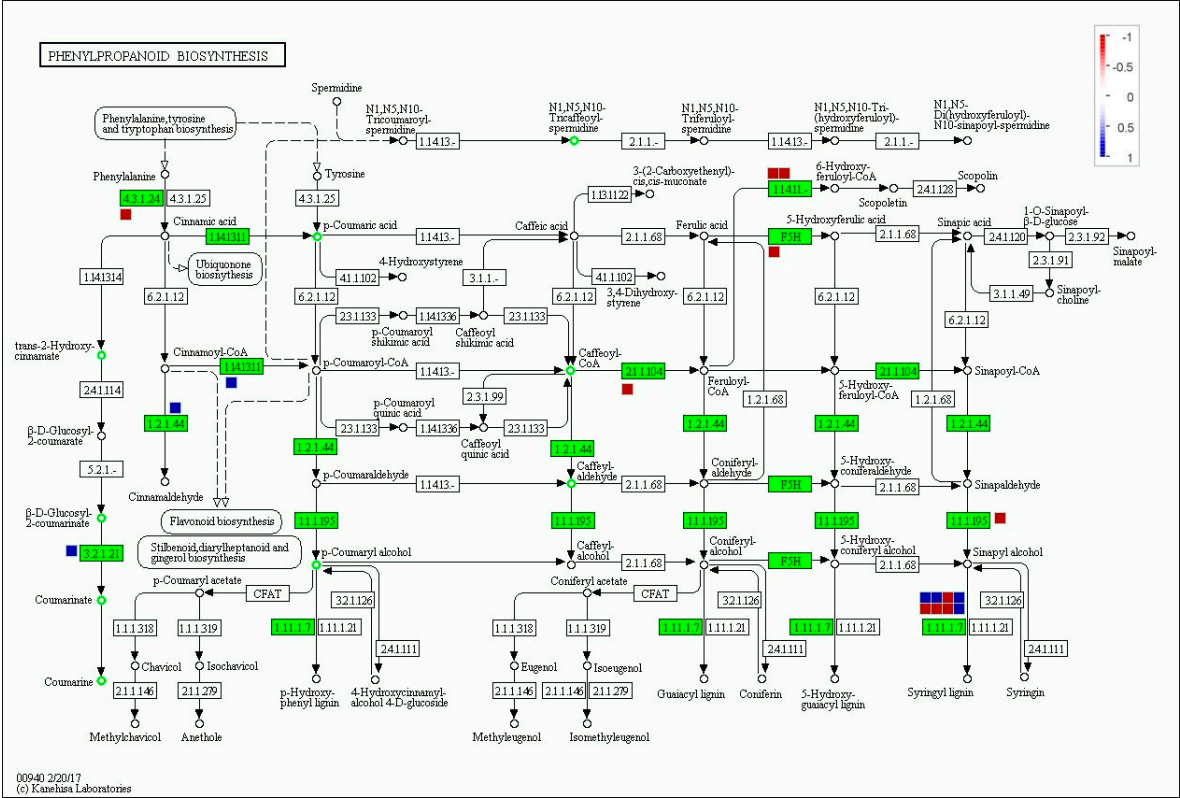

Figure S5: The DEGs and DEMs in phenylpropanoid biosynthesis pathways
