# Supplementary material for: Transcriptome and Metabolome Analysis of Selenium Treated Alfalfa Reveals Influence on Phenylpropanoid Biosynthesis to Enhance Growth
Source: MDPI journal article supplement (doi:10.3390/plants12102038), 2023-05-19
Supplement: s1 [file s1]

**Table S3.** Genes in the phenylpropanoid biosynthesis pathway

| Gene id              | EC                | Description                                                           | Regulation | Log2(FC) |
|----------------------|-------------------|-----------------------------------------------------------------------|------------|----------|
| MsG0480021518.0<br>1 | EC:1.11.1.7       | putative peroxidase                                                   | up         | 14.59    |
| MsG0480021524.0<br>1 | EC:1.11.1.7       | putative peroxidase                                                   | up         | 13.25    |
| MsG0180003601.0<br>1 | EC:1.11.1.7       | polyubiquitin peroxidase 21                                           | up         | 2.75     |
| MsG0880046345.0<br>1 | EC:1.11.1.7       | Gag-Pol polyprotein                                                   | up         | 3.72     |
| MsG0380011489.0<br>1 | EC:1.2.1.44       | cinnamoyl-CoA reductase 1                                             | up         | 1.45     |
| MsG0480018671.0<br>1 | EC:3.2.1.21       | beta-glucosidase 11 isoform<br>X1                                     | up         | 2.35     |
| MsG0180005984.0<br>1 | EC:1.14.13.<br>11 | cytochrome P450 CYP73A100                                             | up         | 2.96     |
| MsG0680032461.0<br>1 | EC:1.11.1.7       | putative peroxidase                                                   | down       | -6.78    |
| MsG0380013348.0<br>1 | EC:1.14.11        | putative oxoglutarate                                                 | down       | -3.3     |
| MsG0180000030.0<br>1 | EC:1.1.1.19<br>5  | probable cinnamyl alcohol<br>dehydrogenase 6                          | down       | -2.08    |
| MsG0380016745.0<br>1 | EC:1.11.1.7       | peroxidase P7                                                         | down       | -3.79    |
| MsG0280007686.0<br>1 | EC:1.11.1.7       | peroxidase                                                            | down       | -2.05    |
| MsG0580025234.0<br>1 | EC:1.14           | ferulate 5-hydroxylase                                                | down       | -3.05    |
| MsG0380014934.0<br>1 | EC:1.11.1.7       | cationic peroxidase 1                                                 | down       | -3.19    |
| MsG0780038491.0<br>1 | EC:1.14.11        | 1-aminocyclopropane-1-<br>carboxylate oxidase homolog<br>1 isoform X1 | down       | -2.77    |
| MsG0580030181.0<br>1 | EC:4.3.1.24       | phenylalanine ammonia-<br>lyase class 3                               | down       | -2.01    |
| MsG0880045881.0<br>1 | EC:2.1.1.10<br>4  | caffeoyl-CoA O-<br>methyltransferase 5                                | down       | -4.56    |
