# Supplementary material for: Transcriptome and Metabolome Analysis of Selenium Treated Alfalfa Reveals Influence on Phenylpropanoid Biosynthesis to Enhance Growth
Source: MDPI journal article supplement (doi:10.3390/plants12102038), 2023-05-19
Supplement: s1 [file s1]

**Table S4.** Metabolite in phenylpropanoid biosynthesis pathway

| Feature id    | Metabolite                         | Regulation | VIP  |
|---------------|------------------------------------|------------|------|
| pos-M929T234  | (S)-3-Hydroxy-3-methylglutaryl-CoA | up         | 2.37 |
| pos-M165T285  | Phenylpyruvate                     | up         | 2.12 |
| pos-M147T286  | Coumarin A                         | up         | 2.14 |
| pos-M271T215  | Apigenin                           | up         | 2.05 |
| pos-M237T285  | Cymoxanil                          | up         | 2.26 |
| pos-M148T52_1 | L-Glutamate                        | up         | 1.93 |
| pos-M139T177  | 4-Hydroxybenzoate                  | up         | 1.78 |
| pos-M231T69   | Piceatannol                        | down       | 2.21 |
| pos-M649T272  | N1,N5,N10-Tricaffeoyl spermidine   | down       | 2.4  |
| pos-M147T253  | Coumarin B                         | down       | 2.44 |
| pos-M433T253  | Isovitexin                         | down       | 2.63 |
| pos-M151T237  | Tolylacetate                       | down       | 1.79 |
| pos-M349T201  | p-Coumaroyl-D-glucose              | down       | 1.96 |
| pos-M439T410  | $\gamma$ -Tocopherol               | down       | 1.65 |
